# Supplementary material
Source: publisher figshare collection journal article supplement (https://acs.figshare.com/ndownloader/files/5123914)
Supplement: Supplementary file 1 [file 5123914]

Table 1.  Crystal data and structure refinement for wa304.
Identification code 	wa304
Empirical formula 	C28 H46 Se2 Si2
Formula weight 	596.75
Temperature 	173(2) K
Wavelength 	0.71073 Å
Crystal system 	Monoclinic
Space group 	P 21/c
Unit cell dimensions	a = 8.2842(7) Å	a= 90°.
	b = 14.9971(11) Å	b= 105.242(7)°.
	c = 12.4940(11) Å	g = 90°.
Volume	1497.6(2) Å3
Z	2
Density (calculated)	1.323 Mg/m3
Absorption coefficient	2.563 mm-1
F(000)	620
Crystal size	0.32 x 0.24 x 0.16 mm3
Theta range for data collection	3.64 to 26.55°.
Index ranges	-10<=h<=10, -18<=k<=18, -15<=l<=15
Reflections collected	22434
Independent reflections	3083 [R(int) = 0.0704]
Completeness to theta = 26.55°	98.6 % 
Absorption correction	Semi-empirical from equivalents
Max. and min. transmission	0.6846 and 0.4943
Refinement method	Full-matrix least-squares on F2
Data / restraints / parameters	3083 / 0 / 145
Goodness-of-fit on F2	1.047
Final R indices [I>2sigma(I)]	R1 = 0.0301, wR2 = 0.0678
R indices (all data)	R1 = 0.0402, wR2 = 0.0708
Largest diff. peak and hole	0.465 and -0.526 e.Å-3

Table 2.  Atomic coordinates ( x 104) and equivalent isotropic displacement parameters (Å2x 103)
for wa304.  U(eq) is defined as one third of the trace of the orthogonalized Uij tensor.
________________________________________________________________________________
	x	y	z	U(eq)
________________________________________________________________________________
Se(1)	4356(1)	5708(1)	4820(1)	42(1)
Si(1)	4513(1)	6170(1)	6609(1)	30(1)
C(1)	6800(3)	6249(2)	7466(2)	37(1)
C(11)	7932(4)	6570(2)	6749(3)	57(1)
C(12)	7030(3)	6889(2)	8461(2)	45(1)
C(13)	7417(3)	5322(2)	7922(2)	47(1)
C(2)	3309(3)	7276(1)	6343(2)	35(1)
C(21)	2877(3)	7591(2)	7411(2)	42(1)
C(22)	1652(3)	7136(2)	5456(2)	48(1)
C(23)	4309(4)	8009(2)	5949(2)	49(1)
C(31)	3291(3)	5363(1)	7246(2)	32(1)
C(32)	3422(3)	5383(2)	8381(2)	39(1)
C(33)	2486(3)	4820(2)	8864(2)	45(1)
C(34)	1398(3)	4218(2)	8221(2)	47(1)
C(35)	1240(3)	4182(2)	7096(3)	50(1)
C(36)	2174(3)	4749(2)	6612(2)	41(1)
________________________________________________________________________________
Table 3.   Bond lengths [Å] and angles [°] for wa304.
_____________________________________________________
Se(1)-Si(1) 	2.3106(6)
Se(1)-Se(1)#1 	2.3666(5)
Si(1)-C(31) 	1.884(2)
Si(1)-C(2) 	1.918(2)
Si(1)-C(1) 	1.919(2)
C(1)-C(11) 	1.536(3)
C(1)-C(13) 	1.538(3)
C(1)-C(12) 	1.543(3)
C(11)-H(11A) 	0.9800
C(11)-H(11B) 	0.9800
C(11)-H(11C) 	0.9800
C(12)-H(12A) 	0.9800
C(12)-H(12B) 	0.9800
C(12)-H(12C) 	0.9800
C(13)-H(13A) 	0.9800
C(13)-H(13B) 	0.9800
C(13)-H(13C) 	0.9800
C(2)-C(23) 	1.533(3)
C(2)-C(22) 	1.535(3)
C(2)-C(21) 	1.544(3)
C(21)-H(21A) 	0.9800
C(21)-H(21B) 	0.9800
C(21)-H(21C) 	0.9800
C(22)-H(22A) 	0.9800
C(22)-H(22B) 	0.9800
C(22)-H(22C) 	0.9800
C(23)-H(23A) 	0.9800
C(23)-H(23B) 	0.9800
C(23)-H(23C) 	0.9800
C(31)-C(32) 	1.393(3)
C(31)-C(36) 	1.395(3)
C(32)-C(33) 	1.388(3)
C(32)-H(32) 	0.9500
C(33)-C(34) 	1.375(4)
C(33)-H(33) 	0.9500
C(34)-C(35) 	1.378(4)
C(34)-H(34) 	0.9500
C(35)-C(36) 	1.391(4)
C(35)-H(35) 	0.9500
C(36)-H(36) 	0.9500

Si(1)-Se(1)-Se(1)#1	100.239(19)
C(31)-Si(1)-C(2)	108.45(10)
C(31)-Si(1)-C(1)	111.39(10)
C(2)-Si(1)-C(1)	115.84(10)
C(31)-Si(1)-Se(1)	108.42(7)
C(2)-Si(1)-Se(1)	101.36(7)
C(1)-Si(1)-Se(1)	110.75(7)
C(11)-C(1)-C(13)	107.8(2)
C(11)-C(1)-C(12)	108.1(2)
C(13)-C(1)-C(12)	107.8(2)
C(11)-C(1)-Si(1)	111.01(18)
C(13)-C(1)-Si(1)	109.56(17)
C(12)-C(1)-Si(1)	112.49(16)
C(1)-C(11)-H(11A)	109.5
C(1)-C(11)-H(11B)	109.5
H(11A)-C(11)-H(11B)	109.5
C(1)-C(11)-H(11C)	109.5
H(11A)-C(11)-H(11C)	109.5
H(11B)-C(11)-H(11C)	109.5
C(1)-C(12)-H(12A)	109.5
C(1)-C(12)-H(12B)	109.5
H(12A)-C(12)-H(12B)	109.5
C(1)-C(12)-H(12C)	109.5
H(12A)-C(12)-H(12C)	109.5
H(12B)-C(12)-H(12C)	109.5
C(1)-C(13)-H(13A)	109.5
C(1)-C(13)-H(13B)	109.5
H(13A)-C(13)-H(13B)	109.5
C(1)-C(13)-H(13C)	109.5
H(13A)-C(13)-H(13C)	109.5
H(13B)-C(13)-H(13C)	109.5
C(23)-C(2)-C(22)	108.8(2)
C(23)-C(2)-C(21)	109.00(19)
C(22)-C(2)-C(21)	107.4(2)
C(23)-C(2)-Si(1)	112.06(17)
C(22)-C(2)-Si(1)	109.42(15)
C(21)-C(2)-Si(1)	110.03(15)
C(2)-C(21)-H(21A)	109.5
C(2)-C(21)-H(21B)	109.5
H(21A)-C(21)-H(21B)	109.5
C(2)-C(21)-H(21C)	109.5
H(21A)-C(21)-H(21C)	109.5
H(21B)-C(21)-H(21C)	109.5
C(2)-C(22)-H(22A)	109.5
C(2)-C(22)-H(22B)	109.5
H(22A)-C(22)-H(22B)	109.5
C(2)-C(22)-H(22C)	109.5
H(22A)-C(22)-H(22C)	109.5
H(22B)-C(22)-H(22C)	109.5
C(2)-C(23)-H(23A)	109.5
C(2)-C(23)-H(23B)	109.5
H(23A)-C(23)-H(23B)	109.5
C(2)-C(23)-H(23C)	109.5
H(23A)-C(23)-H(23C)	109.5
H(23B)-C(23)-H(23C)	109.5
C(32)-C(31)-C(36)	117.1(2)
C(32)-C(31)-Si(1)	120.60(17)
C(36)-C(31)-Si(1)	122.29(17)
C(33)-C(32)-C(31)	121.8(2)
C(33)-C(32)-H(32)	119.1
C(31)-C(32)-H(32)	119.1
C(34)-C(33)-C(32)	120.1(2)
C(34)-C(33)-H(33)	120.0
C(32)-C(33)-H(33)	120.0
C(33)-C(34)-C(35)	119.6(2)
C(33)-C(34)-H(34)	120.2
C(35)-C(34)-H(34)	120.2
C(34)-C(35)-C(36)	120.3(2)
C(34)-C(35)-H(35)	119.8
C(36)-C(35)-H(35)	119.8
C(35)-C(36)-C(31)	121.2(2)
C(35)-C(36)-H(36)	119.4
C(31)-C(36)-H(36)	119.4
_____________________________________________________________
Symmetry transformations used to generate equivalent atoms: 
#1 -x+1,-y+1,-z+1     

Table 4.   Anisotropic displacement parameters (Å2x 103)for wa304.  The anisotropic
displacement factor exponent takes the form: -2p2[ h2a*2U11 + ... + 2 h k a* b* U12 ]
______________________________________________________________________________
	U11	U22	U33	U23	U13	U12
______________________________________________________________________________
Se(1)	61(1) 	35(1)	32(1) 	0(1)	17(1) 	11(1)
Si(1)	32(1) 	29(1)	30(1) 	-2(1)	11(1) 	1(1)
C(1)	29(1) 	42(1)	40(1) 	0(1)	10(1) 	2(1)
C(11)	40(2) 	73(2)	63(2) 	1(1)	23(1) 	-6(1)
C(12)	35(1) 	49(1)	48(1) 	-9(1)	4(1) 	-6(1)
C(13)	40(1) 	49(1)	49(1) 	-2(1)	5(1) 	10(1)
C(2)	39(1) 	31(1)	36(1) 	-1(1)	12(1) 	4(1)
C(21)	46(1) 	38(1)	44(1) 	-7(1)	16(1) 	8(1)
C(22)	44(2) 	50(1)	45(1) 	-4(1)	5(1) 	13(1)
C(23)	60(2) 	35(1)	54(2) 	7(1)	22(1) 	2(1)
C(31)	31(1) 	31(1)	36(1) 	-2(1)	11(1) 	1(1)
C(32)	42(1) 	40(1)	38(1) 	-1(1)	12(1) 	-5(1)
C(33)	47(2) 	49(1)	44(1) 	7(1)	19(1) 	0(1)
C(34)	40(1) 	40(1)	67(2) 	10(1)	24(1) 	1(1)
C(35)	39(1) 	44(1)	68(2) 	-10(1)	16(1) 	-11(1)
C(36)	40(1) 	42(1)	43(1) 	-7(1)	11(1) 	-4(1)
______________________________________________________________________________
Table 5.   Hydrogen coordinates ( x 104) and isotropic displacement parameters (Å2x 103)
for wa304.
________________________________________________________________________________
	x 	y 	z 	U(eq)
________________________________________________________________________________

H(11A)	7567	7162	6448	85
H(11B)	7862	6150	6137	85
H(11C)	9091	6603	7204	85
H(12A)	6650	7487	8193	68
H(12B)	8215	6911	8867	68
H(12C)	6370	6675	8956	68
H(13A)	7285	4901	7306	71
H(13B)	6759	5117	8422	71
H(13C)	8600	5357	8331	71
H(21A)	2242	7124	7670	63
H(21B)	2201	8135	7255	63
H(21C)	3911	7713	7985	63
H(22A)	1002	6668	5699	71
H(22B)	1884	6957	4756	71
H(22C)	1012	7693	5345	71
H(23A)	4589	7814	5271	73
H(23B)	5341	8128	6528	73
H(23C)	3636	8555	5797	73
H(32)	4173	5793	8835	47
H(33)	2597	4850	9639	54
H(34)	759	3830	8550	56
H(35)	489	3767	6649	60
H(36)	2048	4718	5835	50
________________________________________________________________________________
Table 6.  Torsion angles [°] for wa304.
________________________________________________________________
Se(1)#1-Se(1)-Si(1)-C(31)	-61.30(8)
Se(1)#1-Se(1)-Si(1)-C(2)	-175.33(8)
Se(1)#1-Se(1)-Si(1)-C(1)	61.20(8)
C(31)-Si(1)-C(1)-C(11)	156.34(17)
C(2)-Si(1)-C(1)-C(11)	-79.1(2)
Se(1)-Si(1)-C(1)-C(11)	35.59(19)
C(31)-Si(1)-C(1)-C(13)	37.43(19)
C(2)-Si(1)-C(1)-C(13)	161.99(16)
Se(1)-Si(1)-C(1)-C(13)	-83.33(16)
C(31)-Si(1)-C(1)-C(12)	-82.41(18)
C(2)-Si(1)-C(1)-C(12)	42.2(2)
Se(1)-Si(1)-C(1)-C(12)	156.84(15)
C(31)-Si(1)-C(2)-C(23)	173.36(17)
C(1)-Si(1)-C(2)-C(23)	47.3(2)
Se(1)-Si(1)-C(2)-C(23)	-72.64(17)
C(31)-Si(1)-C(2)-C(22)	-65.85(18)
C(1)-Si(1)-C(2)-C(22)	168.08(16)
Se(1)-Si(1)-C(2)-C(22)	48.15(17)
C(31)-Si(1)-C(2)-C(21)	51.92(18)
C(1)-Si(1)-C(2)-C(21)	-74.15(19)
Se(1)-Si(1)-C(2)-C(21)	165.93(15)
C(2)-Si(1)-C(31)-C(32)	-82.6(2)
C(1)-Si(1)-C(31)-C(32)	46.1(2)
Se(1)-Si(1)-C(31)-C(32)	168.16(17)
C(2)-Si(1)-C(31)-C(36)	94.7(2)
C(1)-Si(1)-C(31)-C(36)	-136.70(19)
Se(1)-Si(1)-C(31)-C(36)	-14.6(2)
C(36)-C(31)-C(32)-C(33)	0.0(4)
Si(1)-C(31)-C(32)-C(33)	177.37(19)
C(31)-C(32)-C(33)-C(34)	0.3(4)
C(32)-C(33)-C(34)-C(35)	-0.3(4)
C(33)-C(34)-C(35)-C(36)	0.1(4)
C(34)-C(35)-C(36)-C(31)	0.2(4)
C(32)-C(31)-C(36)-C(35)	-0.2(4)
Si(1)-C(31)-C(36)-C(35)	-177.58(19)
________________________________________________________________
Symmetry transformations used to generate equivalent atoms: 
#1 -x+1,-y+1,-z+1     
